# Supplementary material for: A redox switch regulates the assembly and anti-CRISPR activity of AcrIIC1
Source: Springer Nature journal article supplement (doi:10.1038/s41467-022-34551-8), 2022-11-18
Supplement: MOESM3 [file 41467_2022_34551_MOESM3_ESM.pdf]

## Reporting Summary

Nature Portfolio wishes to improve the reproducibility of the work that we publish. This form provides structure for consistency and transparency in reporting. For further information on Nature Portfolio policies, see our [Editorial Policies](#) and the [Editorial Policy Checklist](#).

### Statistics

For all statistical analyses, confirm that the following items are present in the figure legend, table legend, main text, or Methods section.

n/a Confirmed

- |                                     |                                     |                                                                                                                                                                                                                                                            |
|-------------------------------------|-------------------------------------|------------------------------------------------------------------------------------------------------------------------------------------------------------------------------------------------------------------------------------------------------------|
| <input type="checkbox"/>            | <input checked="" type="checkbox"/> | The exact sample size ( $n$ ) for each experimental group/condition, given as a discrete number and unit of measurement                                                                                                                                    |
| <input type="checkbox"/>            | <input checked="" type="checkbox"/> | A statement on whether measurements were taken from distinct samples or whether the same sample was measured repeatedly                                                                                                                                    |
| <input type="checkbox"/>            | <input checked="" type="checkbox"/> | The statistical test(s) used AND whether they are one- or two-sided<br><i>Only common tests should be described solely by name; describe more complex techniques in the Methods section.</i>                                                               |
| <input checked="" type="checkbox"/> | <input type="checkbox"/>            | A description of all covariates tested                                                                                                                                                                                                                     |
| <input checked="" type="checkbox"/> | <input type="checkbox"/>            | A description of any assumptions or corrections, such as tests of normality and adjustment for multiple comparisons                                                                                                                                        |
| <input type="checkbox"/>            | <input checked="" type="checkbox"/> | A full description of the statistical parameters including central tendency (e.g. means) or other basic estimates (e.g. regression coefficient) AND variation (e.g. standard deviation) or associated estimates of uncertainty (e.g. confidence intervals) |
| <input type="checkbox"/>            | <input checked="" type="checkbox"/> | For null hypothesis testing, the test statistic (e.g. $F$ , $t$ , $r$ ) with confidence intervals, effect sizes, degrees of freedom and $P$ value noted<br><i>Give <math>P</math> values as exact values whenever suitable.</i>                            |
| <input checked="" type="checkbox"/> | <input type="checkbox"/>            | For Bayesian analysis, information on the choice of priors and Markov chain Monte Carlo settings                                                                                                                                                           |
| <input checked="" type="checkbox"/> | <input type="checkbox"/>            | For hierarchical and complex designs, identification of the appropriate level for tests and full reporting of outcomes                                                                                                                                     |
| <input checked="" type="checkbox"/> | <input type="checkbox"/>            | Estimates of effect sizes (e.g. Cohen's $d$ , Pearson's $r$ ), indicating how they were calculated                                                                                                                                                         |

*Our web collection on [statistics for biologists](#) contains articles on many of the points above.*

### Software and code

Policy information about [availability of computer code](#)

Data collection Topspin 3.0 (For NMR data collection), UNICORN 5.11 (For AKTA purification system), Octet Data Acquisition software version 9.

Data analysis NMRPipe mac11\_64, CcpNmr Analysis 2.4.2, TALOS+, CYANA 2.0, Amber 14.0, ForteBio Data Analysis software 9.0, PyMol 2.3.4, AlphaFold v2.0.1, Rosetta InterfaceAnalyzer ([https://www.rosettacommons.org/docs/latest/application\\_documentation/analysis/interface-analyzer](https://www.rosettacommons.org/docs/latest/application_documentation/analysis/interface-analyzer)), XDS 20210323, Coot 0.9.6, autoPROC version 1.0.5, PHENIX v1.19.2\_4158, GraphPad Prism 8, MEGA v7.0.26, ESPript 3.0.

For manuscripts utilizing custom algorithms or software that are central to the research but not yet described in published literature, software must be made available to editors and reviewers. We strongly encourage code deposition in a community repository (e.g. GitHub). See the Nature Portfolio [guidelines for submitting code & software](#) for further information.

### Data

Policy information about [availability of data](#)

All manuscripts must include a [data availability statement](#). This statement should provide the following information, where applicable:

- Accession codes, unique identifiers, or web links for publicly available datasets
- A description of any restrictions on data availability
- For clinical datasets or third party data, please ensure that the statement adheres to our [policy](#)

All data generated or analyzed in this study are included in the main text or the supplementary materials. Atomic coordinates and NMR data for the reduced NmeAcrIIC1 have been deposited in the Protein Data Bank (PDB) under entry ID 7X31 [<https://doi.org/10.2210/pdb7X31/pdb>] and Biological Magnetic Resonance Bank (BMRB) under entry ID 36471 [<https://dx.doi.org/10.13018/BMR36471>]. Atomic coordinates and structure factors for the crystal structures of the oxidized state of NmeAcrIIC1 have been deposited in the PDB under entry ID 7X4B [<https://doi.org/10.2210/pdb7X4B/pdb>]. One other published PDB code cited in this paper

is 5VGB [https://doi.org/10.2210/pdb5vgb/pdb]. The coordinates for the structural models generated in this study are provided as supporting information. The source data are provided as a Source Data file with this paper.

## Field-specific reporting

Please select the one below that is the best fit for your research. If you are not sure, read the appropriate sections before making your selection.

- Life sciences       Behavioural & social sciences       Ecological, evolutionary & environmental sciences

For a reference copy of the document with all sections, see [nature.com/documents/nr-reporting-summary-flat.pdf](https://www.nature.com/documents/nr-reporting-summary-flat.pdf)

## Life sciences study design

All studies must disclose on these points even when the disclosure is negative.

|                 |                                                                                                                                                                                                                                                                                                                                                                                                                                                                |
|-----------------|----------------------------------------------------------------------------------------------------------------------------------------------------------------------------------------------------------------------------------------------------------------------------------------------------------------------------------------------------------------------------------------------------------------------------------------------------------------|
| Sample size     | For structural calculation of the reduced NmeAcrIIC1, 100 starting structures were initially calculated and 20 structures with the lowest Amber energy were reported. The sample size was chosen based on previous similar studies. The RMSD of the 20 structures for the backbone of the secondary structural region is only 0.19 Å, indicating the sample size is sufficient. For all functional assays, three independent experiments (n=3) were performed. |
| Data exclusions | No data were excluded.                                                                                                                                                                                                                                                                                                                                                                                                                                         |
| Replication     | All the assays were replicated more than three times with similar results.                                                                                                                                                                                                                                                                                                                                                                                     |
| Randomization   | Randomization is not relevant to our study, because there is no specific grouping in data collection or analysis.                                                                                                                                                                                                                                                                                                                                              |
| Blinding        | Blinding is not relevant to our study, because there is no specific grouping in data collection or analysis.                                                                                                                                                                                                                                                                                                                                                   |

## Reporting for specific materials, systems and methods

We require information from authors about some types of materials, experimental systems and methods used in many studies. Here, indicate whether each material, system or method listed is relevant to your study. If you are not sure if a list item applies to your research, read the appropriate section before selecting a response.

### Materials & experimental systems

| n/a                                 | Involvement in the study                               |
|-------------------------------------|--------------------------------------------------------|
| <input checked="" type="checkbox"/> | <input type="checkbox"/> Antibodies                    |
| <input checked="" type="checkbox"/> | <input type="checkbox"/> Eukaryotic cell lines         |
| <input checked="" type="checkbox"/> | <input type="checkbox"/> Palaeontology and archaeology |
| <input checked="" type="checkbox"/> | <input type="checkbox"/> Animals and other organisms   |
| <input checked="" type="checkbox"/> | <input type="checkbox"/> Human research participants   |
| <input checked="" type="checkbox"/> | <input type="checkbox"/> Clinical data                 |
| <input checked="" type="checkbox"/> | <input type="checkbox"/> Dual use research of concern  |

### Methods

| n/a                                 | Involvement in the study                        |
|-------------------------------------|-------------------------------------------------|
| <input checked="" type="checkbox"/> | <input type="checkbox"/> ChIP-seq               |
| <input checked="" type="checkbox"/> | <input type="checkbox"/> Flow cytometry         |
| <input checked="" type="checkbox"/> | <input type="checkbox"/> MRI-based neuroimaging |
